# Supplementary material for: Layered lanthanide phosphonates Ln(2-qpH)(SO4)(H2O)2 (Ln = La, Ce, Pr, Nd, Sm): polymorphism and magnetic properties
Source: Royal Society of Chemistry journal article supplement (doi:10.1039/d3dt01698f), 2023-01-01
Supplement: d3dt01698f1.pdf [file d3dt01698f1.pdf]

## Supporting Information for

### **Layered lanthanide phosphonates $\text{Ln}(\text{2-qpH})(\text{SO}_4)(\text{H}_2\text{O})_2$ (Ln = La, Ce, Pr, Nd, Sm): polymorphism and magnetic Properties**

Xiu-Fang Ma, Dai Zeng, Chang Xu, Song-Song Bao, Li-Min Zheng\*

†State Key Laboratory of Coordination Chemistry, School of Chemistry and Chemical Engineering, Collaborative Innovation Center of Advanced Microstructures, Nanjing University, Nanjing 210023, P. R. China.

\*correspondence to: [lmzheng@nju.edu.cn](mailto:lmzheng@nju.edu.cn),

## Contents

|                                               |     |
|-----------------------------------------------|-----|
| I. Literature review of Ce/Nd-based SMMs..... | S3  |
| II. Primary characterization .....            | S6  |
| III. Crystal structures .....                 | S9  |
| IV. Magnetic studies .....                    | S14 |
| V. References .....                           | S21 |

## I. Literature review of Ce/Nd-based SMMs

**Table S1** Literature review of Ce/Nd-based SMMs. Temperature dependence of the relaxation rate:

$$\tau^{-1}(T) = \tau_{\text{QTM}}^{-1} + AT + CTn + \tau_0^{-1} \exp(-U_{\text{eff}}/k_B T)$$

|                                                                                                                               | $H$ (Oe)  | $U_{\text{eff}}/k_B$ (K) | $\tau_0$ (s)          | $C$ ( $\text{K}^{-n}\text{s}^{-1}$ ) | $n$       | $\tau_{\text{QTM}}^{-1}$ ( $\text{s}^{-1}$ ) | $A$  | Ref |
|-------------------------------------------------------------------------------------------------------------------------------|-----------|--------------------------|-----------------------|--------------------------------------|-----------|----------------------------------------------|------|-----|
| <b>Mononuclear compounds</b>                                                                                                  |           |                          |                       |                                      |           |                                              |      |     |
| [CeZn <sub>2</sub> (L1)(AcO) <sub>2</sub> ]BPh <sub>4</sub>                                                                   | 250       | 37                       | $2.7 \times 10^{-7}$  |                                      |           |                                              |      | 1   |
| [NdTp <sub>3</sub> ]                                                                                                          | 100       | 4.1                      | $5.5 \times 10^{-5}$  |                                      |           |                                              |      | 2   |
| [Li(DME) <sub>3</sub> ][Ce(COT <sup>+</sup> ) <sub>2</sub> ]                                                                  | 400       | 30                       | $1.2 \times 10^{-6}$  |                                      |           |                                              |      | 3   |
| [Ce(NO <sub>3</sub> ){Zn(L1)(SCN)} <sub>2</sub> ]                                                                             | 1000      | 35.7                     | $2.2 \times 10^{-7}$  |                                      |           |                                              |      | 4   |
| [Nd(NO <sub>3</sub> ){Zn(L1)(SCN)} <sub>2</sub> ]                                                                             | 1000      | 38.5                     | $2.1 \times 10^{-7}$  |                                      |           |                                              |      | 4   |
| Na <sub>3</sub> [Nd(W <sub>5</sub> O <sub>18</sub> ) <sub>2</sub> ]                                                           | 1000      | 73.9                     | $3.6 \times 10^{-10}$ |                                      |           |                                              |      | 5   |
| [Li(DME) <sub>3</sub> ][Nd(COT <sup>+</sup> ) <sub>2</sub> ]                                                                  | 1000      | 21                       | $5.5 \times 10^{-5}$  |                                      |           |                                              |      | 6   |
| [Ce <sup>III</sup> {Zn <sup>II</sup> (L2)} <sub>2</sub> (MeOH)]BPh <sub>4</sub>                                               | 0         | 21.2                     | $1.6 \times 10^{-7}$  |                                      |           | $3.8 \times 10^{-4}$                         |      | 7   |
| [Ce(NO <sub>3</sub> ) <sub>3</sub> (18-c-6)]                                                                                  | 1000      | 31.4                     | $1.7 \times 10^{-7}$  |                                      |           |                                              |      | 8   |
|                                                                                                                               | 1000      | 30.3                     | $2.2 \times 10^{-7}$  | 0.108                                | 5(fixed)  |                                              |      |     |
|                                                                                                                               | 1000      | 25.6                     | $9.0 \times 10^{-7}$  | 16                                   | 9( fixed) |                                              |      |     |
| [Nd(NO <sub>3</sub> ) <sub>3</sub> (18-c-6)]                                                                                  | 1000      | 29.9                     | $2.9 \times 10^{-9}$  |                                      |           |                                              |      | 8   |
|                                                                                                                               | 1000      | 30.9                     | $2.2 \times 10^{-9}$  | 4.1                                  | 5( fixed) |                                              |      |     |
|                                                                                                                               | 1000      | 33.4                     | $1.6 \times 10^{-9}$  | 0.350                                | 9( fixed) |                                              |      |     |
| [Ce(NO <sub>3</sub> ) <sub>3</sub> (1,10-diaza-18-c-6)]                                                                       | 1000      | 44                       | $2.9 \times 10^{-7}$  |                                      |           |                                              |      | 8   |
|                                                                                                                               | 1000      | 45                       | $2.2 \times 10^{-7}$  | 4.1                                  | 5(fixed)  |                                              |      |     |
|                                                                                                                               | 1000      | 23                       | $1.6 \times 10^{-7}$  | 0.350                                | 9( fixed) |                                              |      |     |
| [Nd(NO <sub>3</sub> ) <sub>3</sub> (1,10-diaza-18-c-6)]                                                                       | 1000      | 69                       | $2.1 \times 10^{-6}$  |                                      |           |                                              |      | 8   |
|                                                                                                                               | 1000      | 55                       | $2.6 \times 10^{-7}$  | 0.050                                | 5(fixed)  |                                              |      |     |
|                                                                                                                               | 1000      | 73                       | $1.4 \times 10^{-6}$  | 10.7                                 | 9( fixed) |                                              |      |     |
| [CeCd <sub>3</sub> (Hquina) <sub>3</sub> ( <i>n</i> -Bu <sub>3</sub> PO) <sub>2</sub> ] <sub>3</sub> ·3EtOH·2H <sub>2</sub> O | 1500      | 27                       | $8.2 \times 10^{-7}$  |                                      |           |                                              |      | 9   |
| [NdL <sub>3</sub> (NO <sub>3</sub> ) <sub>2</sub> ]PF <sub>6</sub> ·MeCN                                                      | 1000(O)   | 36                       | $4.3 \times 10^{-9}$  | 4.1                                  |           |                                              |      | 10  |
|                                                                                                                               | 1000(R)   |                          |                       |                                      | 8.2       |                                              |      |     |
|                                                                                                                               | 1000(O+R) | 34                       | $1.1 \times 10^{-8}$  | 2.8                                  | 5( fixed) |                                              |      |     |
|                                                                                                                               | 1000(O+R) | 10                       | $2.0 \times 10^{-4}$  | 0.081                                | 9( fixed) |                                              |      |     |
| [L4Nd(H <sub>2</sub> O <sub>5</sub> )] <sub>3</sub> ·L4(H <sub>2</sub> O)                                                     | 0         | 16.08                    | $2.6 \times 10^{-4}$  | 16                                   | 9( fixed) |                                              |      | 10  |
|                                                                                                                               |           | 24.68                    | $5.0 \times 10^{-6}$  |                                      |           |                                              |      |     |
| Ce(fdh) <sub>3</sub> (bpy)                                                                                                    | 2000      | 33.3                     | $1.8 \times 10^{-7}$  |                                      |           |                                              |      | 11  |
|                                                                                                                               | 2000(R)   |                          |                       | 0.4                                  | 6         |                                              |      |     |
| Nd(fdh) <sub>3</sub> (bpy)                                                                                                    | 2000      | 28.8                     | $9.2 \times 10^{-8}$  |                                      |           |                                              |      | 11  |
|                                                                                                                               | 200( R)   |                          |                       | 0.93                                 | 6.6       |                                              |      |     |
| [L3Ce(NO <sub>3</sub> ) <sub>3</sub> ]                                                                                        | 200(R)    | 21.5                     | $2.7 \times 10^{-7}$  |                                      |           |                                              |      | 12  |
|                                                                                                                               | 200(R+D)  |                          |                       | 1.44                                 | 6.8       |                                              | 99.5 |     |

|                                                                                                                                                                                         |           |       |                      |                     |      |                     |        |    |
|-----------------------------------------------------------------------------------------------------------------------------------------------------------------------------------------|-----------|-------|----------------------|---------------------|------|---------------------|--------|----|
| $(\text{NH}_2\text{Me}_2)_3\{[\text{Nd}(\text{Mo}_4\text{O}_{13})\text{-(DMF)}_4]_3(\text{BTC})_2\}\cdot 8\text{DMF}$                                                                   | 500       | 26.73 | $1.4\times 10^{-7}$  |                     |      |                     |        | 13 |
| $[\text{Nd}(\text{CyPh}_2\text{PO})_2(\text{H}_2\text{O})_5]_3\cdot 2(\text{CyPh}_2\text{PO})\cdot 3\text{EtOH}$                                                                        | 0(R+Q)    |       |                      |                     | 5.12 |                     | 5.1    | 14 |
|                                                                                                                                                                                         | 200(R)    |       |                      |                     | 6.54 |                     |        |    |
| $[\text{Nd}(\text{CO}_3)_4\text{H}_2\text{O}]^{5-} (\text{C}_1)$                                                                                                                        | 1500 (R)  | 30.7  | $1.1\times 10^{-7}$  |                     |      |                     |        | 15 |
|                                                                                                                                                                                         | 1500(R+D) |       |                      | 0.89                | 6.08 |                     | 125.89 |    |
| $[\text{Nd}(\text{CO}_3)_4\text{H}_2\text{O}]^{5-} (\text{C}_4)$                                                                                                                        | 1500 (R)  | 9.25  | $2.1\times 10^{-6}$  |                     |      |                     |        | 15 |
| $[\text{Ce}(\text{dmsO})_8][\text{Ce}(\eta^2\text{-NO}_3)_2(\text{dmsO})_4(\alpha\text{-Mo}_8\text{O}_{26})_{0.5}][\text{Mo}_6\text{O}_{19}]$                                           | 200       | 24.4  | $1.1\times 10^{-6}$  |                     |      |                     |        | 16 |
| $\text{Cp}^*\text{Nd}(\text{BPh}_4)$                                                                                                                                                    | 1000      | 41.7  | $1.4\times 10^{-6}$  | 0.0286              | 5.2  |                     | 1.1    | 17 |
| $[\text{Nd}(\text{ntfa})_3(\text{phen})]$                                                                                                                                               | 1500(O+R) | 25.88 | $2.2\times 10^{-7}$  | 135                 | 2.4  |                     |        | 18 |
| $[\text{Nd}(\text{ntfa})_3(5,5'\text{-Me}_2\text{bipy})]$                                                                                                                               | 1500(O+R) | 44.56 | $1.0\times 10^{-9}$  | 186                 | 3.0  |                     |        | 18 |
| $[\text{Nd}(\text{ntfa})_3(4,4'\text{-Me}_2\text{bipy})]$                                                                                                                               | 1500(O+R) | 27.31 | $8.7\times 10^{-8}$  | 59                  | 2.3  |                     |        | 18 |
| <b>Polynuclear compounds</b>                                                                                                                                                            |           |       |                      |                     |      |                     |        |    |
| $[\text{Nd}_2(\text{CNCH}_2\text{COO})_6(\text{H}_2\text{O})_4]\cdot 2\text{H}_2\text{O}$                                                                                               | 1500      | 26.6  | $1.8\times 10^{-7}$  |                     |      |                     |        | 19 |
| $\text{K}_{14}\text{Na}_6\text{H}_4\{[(\text{As}_2\text{W}_{19}\text{O}_{67}(\text{H}_2\text{O}))\text{Nd}(\text{H}_2\text{O})_2]_2(\text{C}_2\text{O}_4)]\}\cdot 64\text{H}_2\text{O}$ | 500       | 6.78  | $5.5\times 10^{-12}$ |                     |      |                     |        | 20 |
| $[\text{Nd}_2(2\text{-FBz})_4(\text{NO}_3)_2(\text{phen})_2]$                                                                                                                           | 1500      | 13.67 | $7.4\times 10^{-6}$  | 0.02                | 9    |                     | 265.21 | 21 |
| $[\text{Nd}_2(\mu_2\text{-9-AC})_4(9\text{-AC})_2(\text{bpy})_2]$                                                                                                                       | 4000(R)   | 11.5  | $7.5\times 10^{-6}$  |                     |      |                     |        | 22 |
|                                                                                                                                                                                         | 4000(R+D) |       |                      | 1.03                | 6    |                     | 823.60 |    |
| $[\text{Nd}_2(\text{L})_4(\text{H}_2\text{O})_6](\text{L}_5)_2(\text{H}_2\text{O})_{14}$                                                                                                | 1200      | 21.2  | $1.6\times 10^{-7}$  |                     |      | $3.8\times 10^{-4}$ |        | 23 |
| $[\text{Nd}^{\text{III}}_4(\text{H}_2\text{O})_{17}(\text{pzdo})_5][\text{Mo}^{\text{IV}}(\text{CN})_8]_3\cdot 9\text{H}_2\text{O}$                                                     | 1500(R)   |       |                      | 312                 | 2.99 |                     |        | 24 |
| $[\text{Nd}^{\text{III}}_6(\mu_3\text{-OH})(\mu_3\text{-}\eta^2\text{-Form})_6(\text{Form})_2(\text{NO}_3)_2(\text{BMPC})_3(\text{H}_2\text{O})_2]$                                     | 3000      | 3.4   | $3.1\times 10^{-4}$  |                     |      |                     |        | 25 |
| <b>1D compounds</b>                                                                                                                                                                     |           |       |                      |                     |      |                     |        |    |
| $\{[\text{Nd}(\mu_2\text{-L}_5)_3(\text{H}_2\text{O})_2]\cdot \text{MeCN}\}_n$                                                                                                          | 2000      | 27    | $4.1\times 10^{-7}$  |                     |      |                     |        | 26 |
| $[\text{Nd}(\mu_2\text{-L}_6)(\text{L}_6)(\text{CH}_3\text{COO})(\text{H}_2\text{O})_2]_n$                                                                                              | 3500      | 29    | $3.1\times 10^{-7}$  |                     |      |                     |        | 26 |
| $[\text{Nd}(\mu_2\text{-L}_5)_3(\text{H}_2\text{O})_2]\cdot \text{H}_2\text{O}$                                                                                                         | 2000      | 28(2) | $7.3\times 10^{-7}$  |                     |      |                     |        | 27 |
| $[\text{Nd}(\mu_2\text{-L}_6)_2(\text{CH}_3\text{COO})(\text{H}_2\text{O})_2]_n$                                                                                                        | 2000      | 19.7  | $3.4\times 10^{-7}$  |                     |      |                     |        | 27 |
| $\{[\text{Nd}(\text{pzdo})(\text{H}_2\text{O})_4][\text{Co}(\text{CN})_6]\}_0.5(\text{pzdo})\cdot 4\text{H}_2\text{O}$                                                                  | 1000      | 51    | $4.5\times 10^{-8}$  | 0.09                | 5.6  | 2.2                 |        | 28 |
| $[\text{Nd}(\alpha\text{-fur})_3(\text{H}_2\text{O})_2]_n$                                                                                                                              | 1200      | 121   | $1.0\times 10^{-13}$ | 141                 | 3.7  | 350                 | 1900   | 29 |
| $(\text{Nd}_{0.065}\text{La}_{0.935}(\alpha\text{-fur})_3(\text{H}_2\text{O})_2)_n$                                                                                                     | 1200      | 61    | $3.6\times 10^{-11}$ | $2.9\times 10^{-3}$ | 9.9  | 7.82                | 0.25   | 29 |

L1 = 6,6'-(ethane-1,2-diy)bis(azanylylidene))bis(methanylylidene))bis(2-methoxyphenol); Tp<sup>-</sup> = trispyrazolylborate; DME = dimethoxyethane; COT<sup>-</sup> = 1,4-bis(trimethylsilyl)cyclooctatetraenyldianion; L2 = 6,6'-(2,2-dimethylpropane-1,3-diy)bis(azan-1-yl-1-

ylidene)bis(methan-1-yl-1-ylidene) bis(2-methoxyphenol); 18-Crown-6 = 1,4,7,10,13,16-hexaoxacyclooctadecane; 1,10-diaza-18-crown-6 = 1,4,10,13-tetraoxa-7,16-diazacyclooctadecane; H<sub>2</sub>quinha = quinaldichydroxamic acid; L3 = a helical hexa-dentate; L4 = tBuPO(NHiPr)<sub>2</sub>; fdh = 1,1,1-fluoro-5,5-dimethyl-hexa-2,4-dione; bpy = 2,2'-bipyridine; dmsO = dimethylsulfoxide; Tp<sup>-</sup> = trispyrazolylborate; H<sub>2</sub>FBz = 2-fluorobenzoic acid; phen = 1,10-phenanthroline; H<sub>2</sub>FBz = 2-fluorobenzoic acid; phen = 1,10-phenanthroline; L5 = 2,6-dioxo-5-[(2,4,6-trioxo-5-hexahydropyrimidinylidene)amino]-3H-pyrimidin-4-olate; pzdo = pyrazine-N,N'-dioxide; BMPC = (9E)-N'-(1-(6-(E)-1-(5-(pyridine-2-yl)-1H-pyrazole-3-carbonylimino)ethyl)pyridin-2-yl)-ethenamine)-3-(pyridine-2-yl)-1H-pyrazole-5-carbohydrazide; L5 = 3,5-dinitrobenzoic acid; L6 = 2,4-dinitrobenzoic acid; pzdo = pyrazine-N,N'-dioxide; pzdo = pyrazine-N,N'-dioxide; α-fur = C<sub>4</sub>H<sub>3</sub>OCOO.

## II. Primary characterization

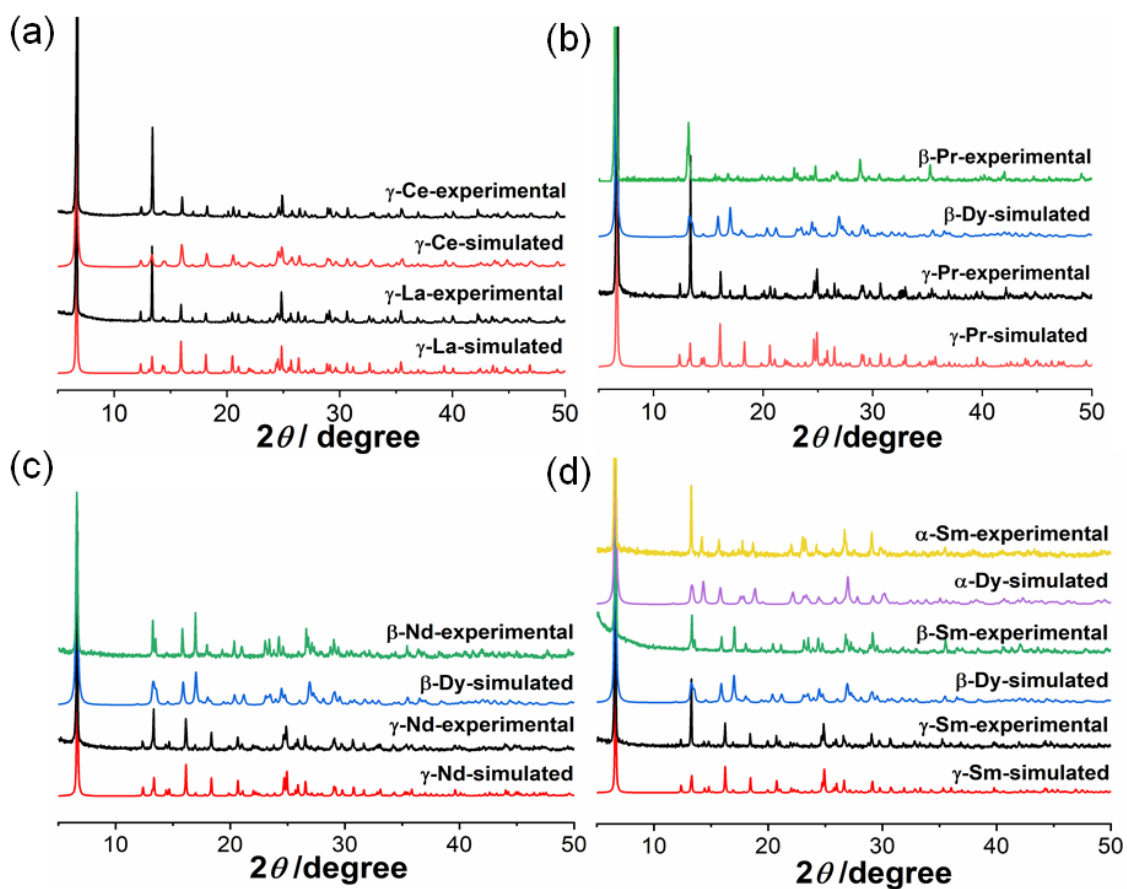

**Figure S1.** The powder XRD patterns for compounds  $\gamma$ -La,  $\gamma$ -Ce (a),  $\beta$ -Ln and  $\gamma$ -Ln [Ln = Pr (b), Nd (c)],  $\alpha$ -Sm,  $\beta$ -Sm and  $\gamma$ -Sm (d). The patterns simulated from the single crystal data are also given. Since single crystal data of  $\alpha$ -Ln and  $\beta$ -Ln are not available, the pattern simulated from the single crystal data of  $\alpha$ -Dy and  $\beta$ -Dy are presented in for comparison.

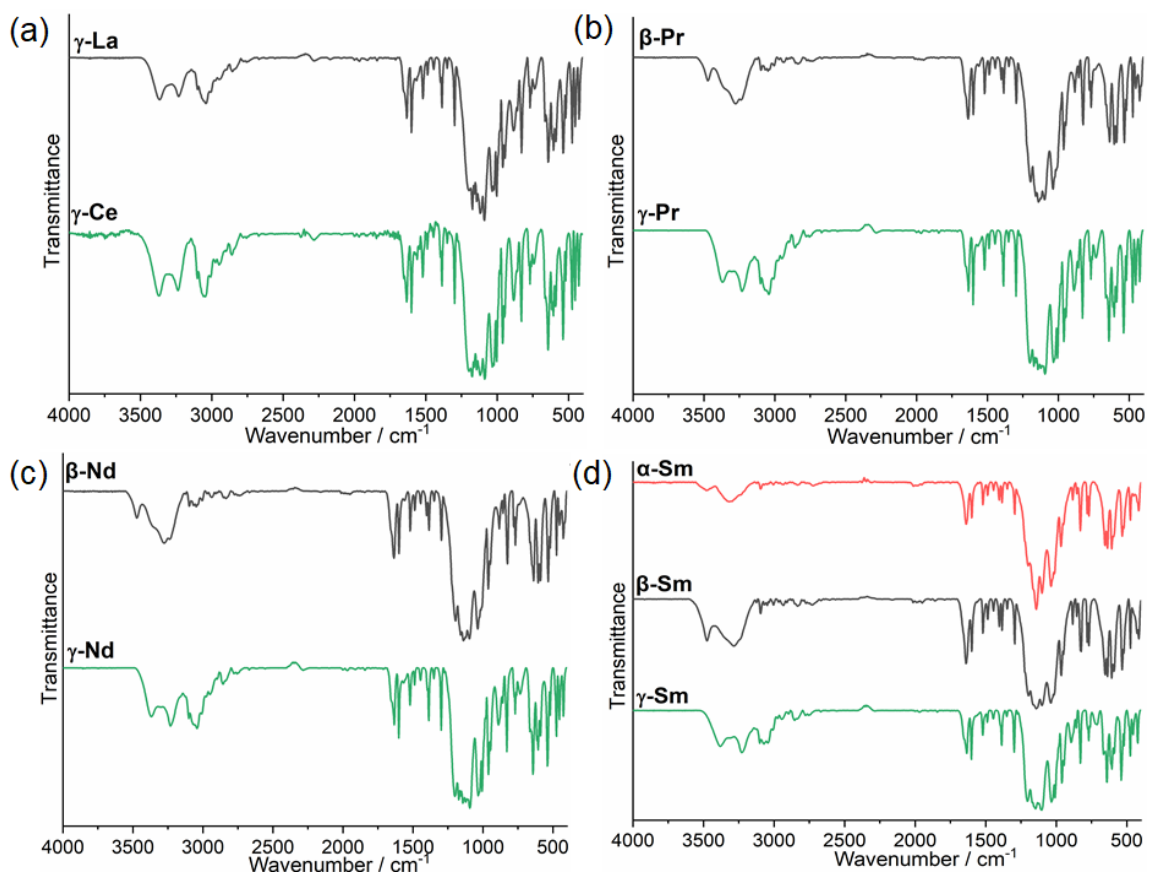

**Figure S2.** IR plots for compounds  $\gamma$ -La,  $\gamma$ -Ce (a),  $\beta$ -Ln and  $\gamma$ -Ln [Ln = Pr (b), Nd (c)],  $\alpha$ -Sm,  $\beta$ -Sm and  $\gamma$ -Sm (d).

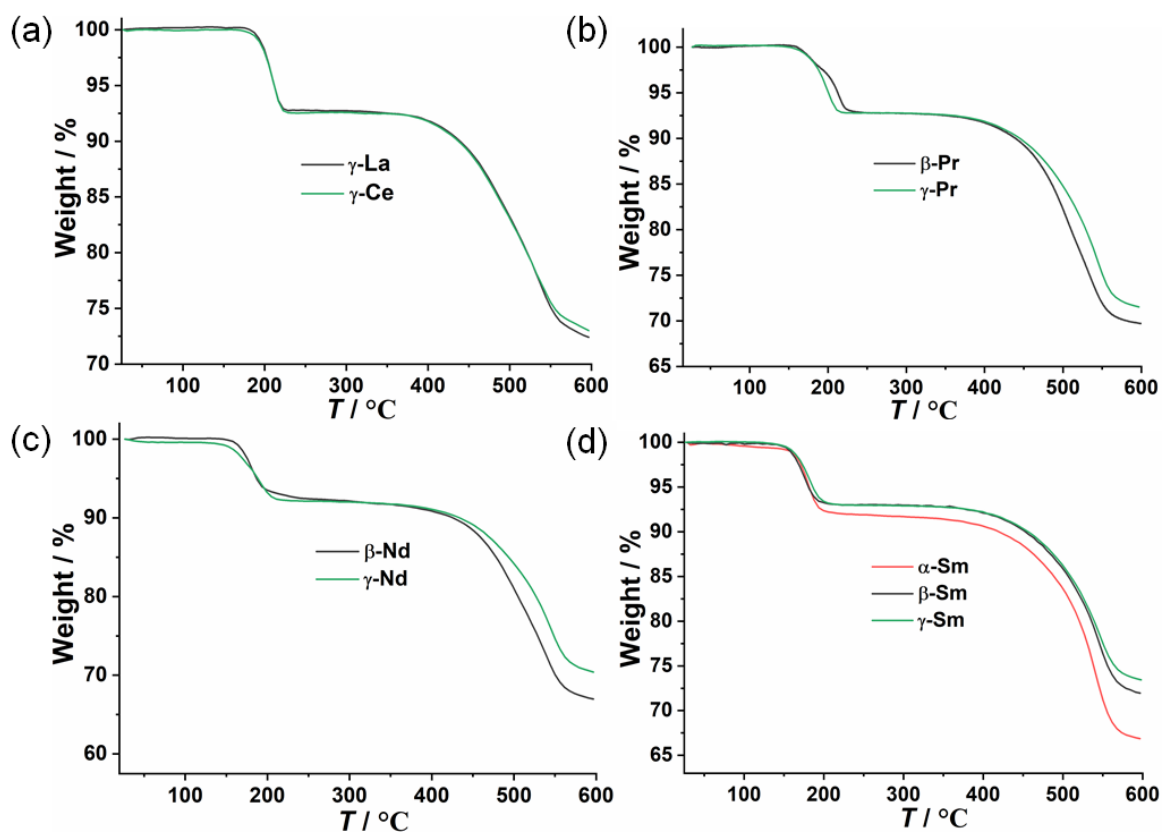

**Figure S3.** TG plots for complexes compounds  $\gamma$ -La,  $\gamma$ -Ce (a),  $\beta$ -Ln and  $\gamma$ -Ln [Ln = Pr (b), Nd (c)],  $\alpha$ -Sm,  $\beta$ -Sm and  $\gamma$ -Sm (d). The weight losses in the temperature range 25-250 °C are 7.4 % for La (calcd. 7.5 %), 7.5 % for Ce (calcd. 7.5 %), 7.4 % for Pr (calcd. 7.5 %), 7.5% for Nd (7.4 %), and 7.4 % for  $\alpha$ -Sm and 7.2% for  $\beta$ -Sm and  $\gamma$ -Sm (calcd. 7.3 %).



### III. Crystal structures

**Table S2.** Crystallographic data for  $\gamma$ -Ln.

|                                                                                                   | $\gamma$ -La                                        | $\gamma$ -Ce                                        | $\gamma$ -Pr                                        | $\gamma$ -Nd                                        | $\gamma$ -Sm                                        |
|---------------------------------------------------------------------------------------------------|-----------------------------------------------------|-----------------------------------------------------|-----------------------------------------------------|-----------------------------------------------------|-----------------------------------------------------|
| Empirical Formula                                                                                 | C <sub>9</sub> H <sub>11</sub> LaNO <sub>9</sub> PS | C <sub>9</sub> H <sub>11</sub> CeNO <sub>9</sub> PS | C <sub>9</sub> H <sub>11</sub> PrNO <sub>9</sub> PS | C <sub>9</sub> H <sub>11</sub> NdNO <sub>9</sub> PS | C <sub>9</sub> H <sub>11</sub> SmNO <sub>9</sub> PS |
| Fw                                                                                                | 479.13                                              | 480.34                                              | 481.13                                              | 484.46                                              | 490.60                                              |
| crystal system                                                                                    | Orthorhombic                                        | Orthorhombic                                        | Orthorhombic                                        | Orthorhombic                                        | Orthorhombic                                        |
| Space group                                                                                       | Pbca                                                | Pbca                                                | Pbca                                                | Pbca                                                | Pbca                                                |
| <i>a</i> (Å)                                                                                      | 8.5067(19)                                          | 8.4923(11)                                          | 8.4758(18)                                          | 8.4677(19)                                          | 8.4635(7)                                           |
| <i>b</i> (Å)                                                                                      | 12.250(3)                                           | 12.1763(15)                                         | 12.107(3)                                           | 12.060(3)                                           | 11.9568(11)                                         |
| <i>c</i> (Å)                                                                                      | 26.474(6)                                           | 26.509(3)                                           | 26.511(6)                                           | 26.514(6)                                           | 26.595(2)                                           |
| <i>V</i> (Å <sup>3</sup> ), <i>Z</i>                                                              | 2758.8(11), 8                                       | 2741.1(6), 8                                        | 2720.4(10), 8                                       | 2707.5(10), 8                                       | 2691.4(4), 8                                        |
| <i>D</i> <sub>c</sub> (g cm <sup>-3</sup> )                                                       | 2.307                                               | 2.328                                               | 2.349                                               | 2.377                                               | 2.421                                               |
| <i>F</i> (000)                                                                                    | 1856                                                | 1864                                                | 1872                                                | 1880                                                | 1896                                                |
| $\mu$ (mm <sup>-1</sup> )                                                                         | 3.412                                               | 3.638                                               | 3.901                                               | 4.156                                               | 4.687                                               |
| reflins collected                                                                                 | 13735                                               | 13788                                               | 13618                                               | 13512                                               | 13442                                               |
| unique reflns                                                                                     | 2700                                                | 2698                                                | 2676                                                | 2667                                                | 2650                                                |
| <i>R</i> <sub>int</sub>                                                                           | 0.0438                                              | 0.0896                                              | 0.0379                                              | 0.0423                                              | 0.0367                                              |
| GOF on <i>F</i> <sup>2</sup>                                                                      | 1.074                                               | 1.029                                               | 1.198                                               | 1.271                                               | 1.218                                               |
| <i>R</i> <sub>1</sub> , <i>wR</i> <sub>2</sub> [ <i>I</i> > 2 $\sigma$ ( <i>I</i> )] <sup>a</sup> | 0.0544, 0.0939                                      | 0.0609, 0.1195                                      | 0.0375, 0.0748                                      | 0.0417, 0.0817                                      | 0.0314, 0.0689                                      |
| <i>R</i> <sub>1</sub> , <i>wR</i> <sub>2</sub> (all data) <sup>a</sup>                            | 0.0614, 0.0969                                      | 0.0913, 0.1328                                      | 0.0430, 0.0769                                      | 0.0453, 0.0832                                      | 0.0333, 0.0697                                      |
| CCDC number                                                                                       | 2233015                                             | 2233016                                             | 2233020                                             | 2233021                                             | 2233022                                             |

$$^a R_1 = \frac{\sum ||F_o| - |F_c||}{\sum |F_o|}, wR_2 = \left[ \frac{\sum w(F_o^2 - F_c^2)^2}{\sum w(F_o^2)^2} \right]^{1/2}$$

**Table S3.** Selected bond lengths (Å) and angles (°) for  $\gamma$ -Ln.

|             | $\gamma$ -La | $\gamma$ -Ce | $\gamma$ -Pr | $\gamma$ -Nd | $\gamma$ -Sm |
|-------------|--------------|--------------|--------------|--------------|--------------|
| Ln1-O1      | 2.501(5)     | 2.469(7)     | 2.445(4)     | 2.423(4)     | 2.385(3)     |
| Ln1-O4      | 2.573(5)     | 2.553(6)     | 2.535(4)     | 2.522(4)     | 2.500(3)     |
| Ln1-O5      | 2.636(5)     | 2.608(6)     | 2.582(4)     | 2.563(4)     | 2.523(3)     |
| Ln1-O2A     | 2.472(5)     | 2.425(7)     | 2.404(4)     | 2.381(4)     | 2.330(4)     |
| Ln1-O3B     | 2.406(5)     | 2.368(6)     | 2.354(3)     | 2.345(4)     | 2.310(4)     |
| Ln1-O5C     | 2.612(5)     | 2.586(6)     | 2.572(3)     | 2.557(4)     | 2.526(3)     |
| Ln1-O1W     | 2.488(5)     | 2.471(7)     | 2.441(4)     | 2.423(4)     | 2.394(3)     |
| Ln1-O2W     | 2.593(5)     | 2.582(6)     | 2.560(4)     | 2.549(4)     | 2.530(3)     |
| O1-Ln1-O1W  | 81.10(18)    | 81.2(2)      | 80.41(12)    | 80.06(14)    | 79.36(12)    |
| O1-Ln1-O2W  | 90.91(17)    | 89.8(2)      | 89.25(12)    | 88.66(14)    | 86.60(12)    |
| O1-Ln1-O4   | 144.21(17)   | 145.0(2)     | 145.02(12)   | 145.26(15)   | 145.95(11)   |
| O1-Ln1-O5   | 146.63(17)   | 147.0(2)     | 147.47(11)   | 147.83(13)   | 148.78(11)   |
| O1-Ln1-O2A  | 116.58(16)   | 115.9(2)     | 115.34(13)   | 114.65(15)   | 113.24(12)   |
| O1-Ln1-O3C  | 79.52(18)    | 80.5(2)      | 81.27(12)    | 81.83(14)    | 83.81(12)    |
| O1-Ln1-O5A  | 82.71(16)    | 82.6(2)      | 82.74(11)    | 82.67(12)    | 82.78(10)    |
| O1W-Ln1-O2W | 136.28(17)   | 135.3(2)     | 134.42(11)   | 133.61(13)   | 131.66(11)   |

|             |            |            |            |            |            |
|-------------|------------|------------|------------|------------|------------|
| O1W-Ln1-O4  | 69.60(18)  | 69.7(2)    | 70.15(12)  | 70.38(15)  | 70.92(11)  |
| O1W-Ln1-O5  | 123.14(17) | 123.8(2)   | 124.66(12) | 125.28(13) | 126.40(11) |
| O1W-Ln1-O2B | 75.08(18)  | 75.2(2)    | 74.92(13)  | 74.77(15)  | 74.55(12)  |
| O1W-Ln1-O3C | 74.50(18)  | 75.2(2)    | 75.79(12)  | 76.42(14)  | 77.61(12)  |
| O1W-Ln1-O5A | 149.64(17) | 150.1(2)   | 149.98(11) | 150.05(13) | 150.43(11) |
| O2W-Ln1-O4  | 124.45(17) | 124.6(2)   | 124.86(12) | 124.96(13) | 125.69(11) |
| O2W-Ln1-O5  | 85.39(16)  | 85.22(19)  | 85.66(11)  | 85.75(13)  | 86.60(10)  |
| O2W-Ln1-O3C | 146.25(17) | 146.4(2)   | 146.40(12) | 146.39(13) | 146.60(11) |
| O2W-Ln1-O2B | 70.42(17)  | 69.8(2)    | 69.88(12)  | 69.56(14)  | 69.17(12)  |
| O2W-Ln1-O5A | 69.27(16)  | 69.44(19)  | 69.60(10)  | 69.79(12)  | 69.89(10)  |
| O4-Ln1-O5   | 53.68(16)  | 54.22(19)  | 54.61(11)  | 54.98(12)  | 55.53(10)  |
| O4-Ln1-O2B  | 75.94(17)  | 75.6(2)    | 75.32(12)  | 75.22 (14) | 74.82(12)  |
| O4-Ln1-O3C  | 73.31(18)  | 73.7 (2)   | 73.67(12)  | 73.98(13)  | 74.06(11)  |
| O4-Ln1-O5A  | 112.80(16) | 113.50(19) | 114.11(11) | 114.74(12) | 116.00(10) |
| O5-Ln1-O2B  | 93.41(17)  | 92.9(2)    | 92.93(12)  | 92.91(14)  | 92.55(12)  |
| O5-Ln1-O3C  | 85.33(18)  | 85.6(2)    | 85.40(11)  | 85.49(13)  | 85.29(11)  |
| O5-Ln1-O5A  | 64.96(18)  | 65.1(2)    | 65.37(12)  | 65.67(14)  | 66.28(12)  |
| O2B-Ln1-O3C | 142.53(17) | 143.0(2)   | 142.92(12) | 143.28(13) | 143.49(12) |
| O3C-Ln1-O5A | 77.41(17)  | 77.4(2)    | 77.23(11)  | 77.04(13)  | 77.19(11)  |
| O2B-Ln1-O5A | 135.28(17) | 134.7(2)   | 135.02(12) | 135.02(14) | 134.63(12) |

Symmetry transformations used to generate equivalent atoms for  $\gamma$ -Ln: A: 1-x,1-y,1-z; B: -x,1-y,1-z; C: 1/2+x,1/2-y,1-z.

**Table S4.** Continuous Shape Measure (CShM) analyses of dysprosium geometries for  $\gamma$ -Ce using the SHAPE2.1 Software.

| Geometry                                    | $\gamma$ -La | $\gamma$ -Ce | $\gamma$ -Pr | $\gamma$ -Nd | $\gamma$ -Sm |
|---------------------------------------------|--------------|--------------|--------------|--------------|--------------|
| Hexagonal bipyramid ( $D_{6h}$ )            | 16.175       | 16.040       | 15.972       | 15.924       | 15.635       |
| Cube ( $O_h$ )                              | 12.124       | 12.074       | 12.046       | 12.014       | 11.895       |
| Square antiprism ( $D_{4d}$ )               | 3.237        | 3.156        | 3.093        | 3.049,       | 2.983        |
| Triangular dodecahedron ( $D_{2d}$ )        | 2.747        | 2.632        | 2.508        | 2.416        | 2.248        |
| Johnson gyrobifastigium J26 ( $D_{2d}$ )    | 13.556       | 13.289       | 13.222       | 13.125       | 12.812       |
| Johnson elongated triangular ( $D_{3h}$ )   | 24.986       | 25.074       | 25.325       | 25.486       | 25.869       |
| Biaugmented trigonal prism J50 ( $C_{2v}$ ) | 3.029        | 2.911        | 2.803        | 2.747        | 2.595        |
| Biaugmented trigonal prism ( $C_{2v}$ )     | 2.051        | 1.979        | 1.919        | 1.901        | 1.837        |
| Snub diphenoid J84 ( $D_{2d}$ )             | 4.390        | 4.188        | 4.078        | 3.971        | 3.728        |
| Triakis tetrahedron ( $T_d$ )               | 2.051        | 12.670       | 12.641       | 12.637       | 12.565       |
| Elongated trigonal bipyramid ( $D_{3h}$ )   | 4.390        | 21.745       | 22.016       | 22.208       | 22.679       |

**Table S5.** Hydrogen bond lengths (Å) and angles (deg) for compound  $\gamma$ -Ce.

| D-H...A                       | $d(\text{D-H})/\text{Å}$ | $d(\text{H...A})/\text{Å}$ | $d(\text{D...A})/\text{Å}$ | $\angle \text{DHA}/^\circ$ |
|-------------------------------|--------------------------|----------------------------|----------------------------|----------------------------|
| N1-H1...O4 <sup>i</sup>       | 0.9100                   | 1.9700                     | 2.849(10)                  | 163.00                     |
| O1W-H1Wa...O6 <sup>ii</sup>   | 0.9100                   | 1.7800                     | 2.679(9)                   | 172.00                     |
| O1W-H1Wb...O2W <sup>iii</sup> | 0.9100                   | 1.8400                     | 2.725(9)                   | 166.00                     |
| O2W-H2Wa...O1 <sup>iv</sup>   | 0.9100                   | 1.8400                     | 2.712(9)                   | 160.00                     |
| O2W-H2Wb...O7 <sup>v</sup>    | 0.9000                   | 1.7800                     | 2.655(9)                   | 163.00                     |
| C5-H5...O6 <sup>i</sup>       | 0.9300                   | 2.5000                     | 3.155(13)                  | 127.00                     |
| C8-H8...O4 <sup>i</sup>       | 0.9300                   | 2.5500                     | 3.267(12)                  | 134.00                     |

Symmetry codes: i,  $-1/2+x, 1/2-y, 1-z$ ; ii,  $1/2-x, -1/2+y, +z$ ; iii,  $-x, 1-y, 1-z, 1/2-z$ ; iv,  $1/2-x, 1/2+y, +z$ ; v,  $1-x, 1-y, 1-z$ .

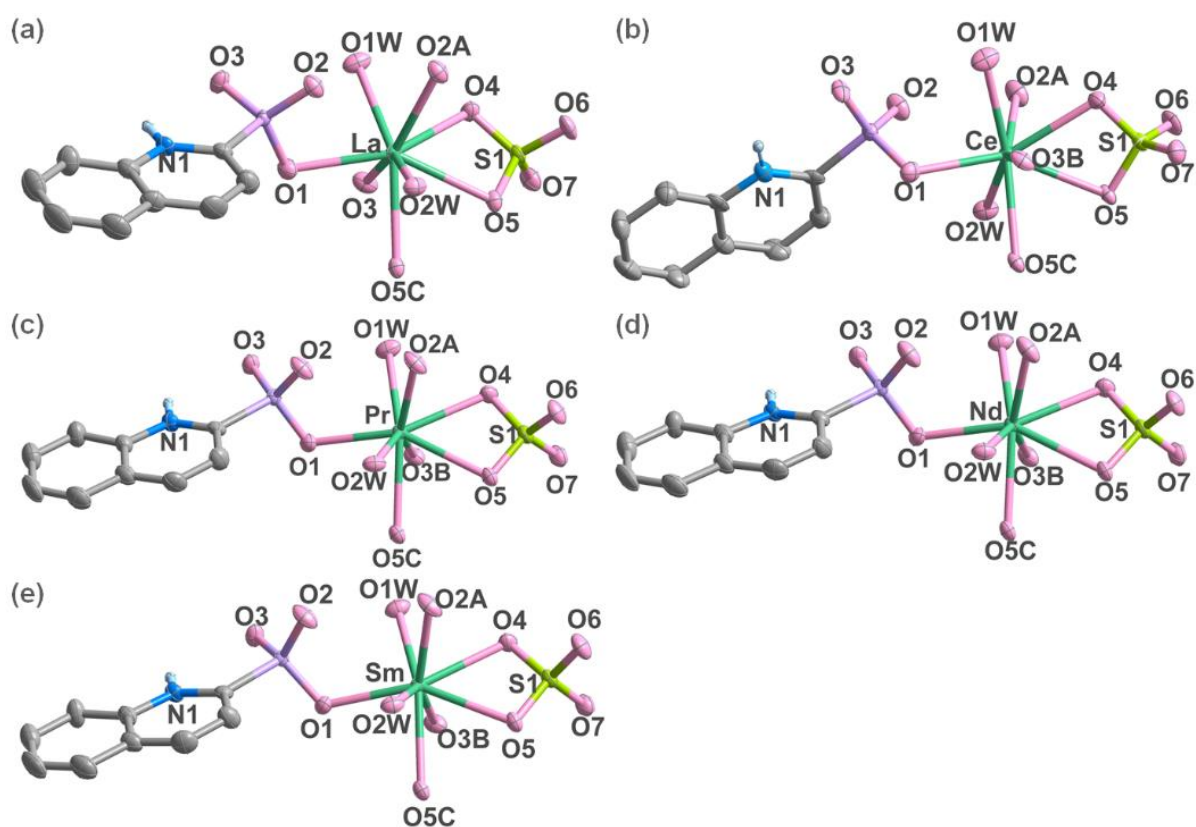**Figure S4.** Building units of structures  $\gamma$ -La (a),  $\gamma$ -Ce (b),  $\gamma$ -Pr (c),  $\gamma$ -Nd (d) and  $\gamma$ -Sm (e) with an atomic labelling scheme (50% probability).

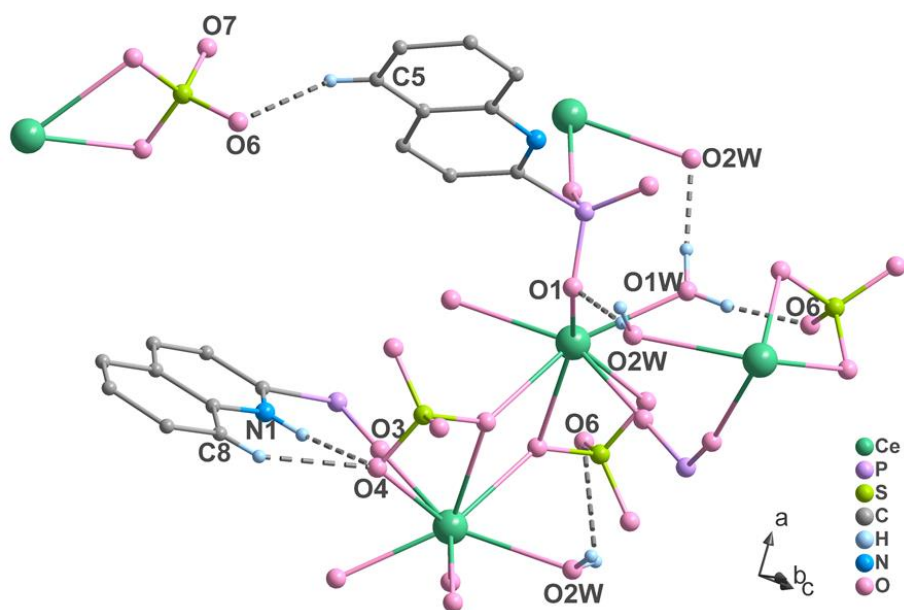

**Figure S4.** Intra- and inter-layer hydrogen-bond interactions for  $\gamma$ -Ce.

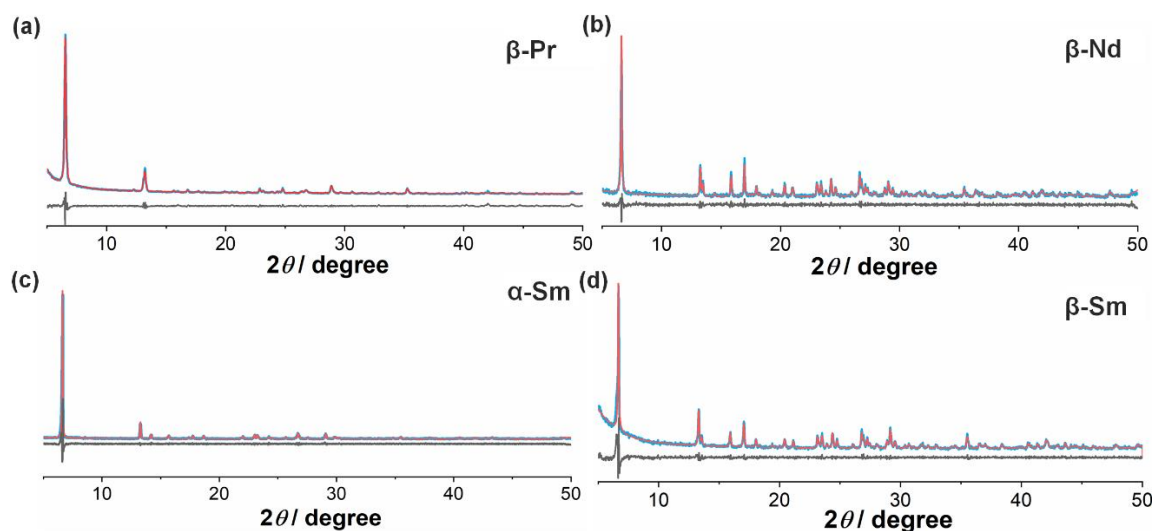

**Figure S5** The PXRD pattern of  $\beta$ -Pr (a),  $\beta$ -Nd (b),  $\alpha$ -Sm (c) and  $\beta$ -Sm (d) refined by TOPAS software to determine the unit cell.

**Table S6.** Crystallographic parameters of compounds  $\beta$ -Pr,  $\beta$ -Nd,  $\alpha$ -Sm and  $\beta$ -Sm obtained by fitting with TOPAS software. Crystallographic parameters of  $\alpha$ -Dy and  $\beta$ -Dy are presented in for comparison.

|                       | $\alpha$ -Dy            | $\beta$ -Dy | $\beta$ -Pr | $\beta$ -Nd | $\alpha$ -Sm | $\beta$ -Sm |
|-----------------------|-------------------------|-------------|-------------|-------------|--------------|-------------|
| crystal               | monoclinic              | triclinic   | triclinic   | triclinic   | monoclinic   | triclinic   |
| Space                 | $P2_1/c$                | $P\bar{1}$  | $P\bar{1}$  | $P\bar{1}$  | $P2_1/c$     | $P\bar{1}$  |
| $a$ (Å)               | 13.3163(5)              | 6.792(3)    | 6.08        | 6.85        | 13.33        | 6.83        |
| $b$ (Å)               | 6.7704(3)               | 7.596(4)    | 7.72        | 7.64        | 6.84         | 7.62        |
| $c$ (Å)               | 15.0967(6)              | 13.368(6)   | 13.61       | 13.41       | 15.25        | 13.38       |
| $\alpha$ (deg)        | 90                      | 90.362(8)   | 90.92       | 90.32       | 90           | 90.33       |
| $\beta$ (deg)         | 90.6391(6) <sup>o</sup> | 93.280(7)   | 93.24       | 93.12       | 90.72        | 93.15       |
| $\gamma$ (deg)        | 90                      | 102.383(7)  | 101.66      | 102.00      | 90           | 102.10      |
| $V$ (Å <sup>3</sup> ) | 1360.98(10)             | 672.4(5)    | 624.25      | 686.57      | 1390.63      | 679.77      |
| $R_{wp}$ (%)          | -                       | -           | 10.9        | 8.5         | 12.4         | 7.9         |

#### IV. Magnetic studies

**Table S7** The parameters obtained by fitting the ac magnetic susceptibilities for  $\gamma$ -Ce under different dc fields at 2K.

| Field / Oe | $\chi_T / \text{cm}^3 \text{mol}^{-1}$ | $\chi_S / \text{cm}^3 \text{mol}^{-1}$ | $\ln(\tau / \text{s})$ | $\alpha$ | Residual             |
|------------|----------------------------------------|----------------------------------------|------------------------|----------|----------------------|
| 500        | 0.13                                   | 0.09                                   | -7.72                  | 0.14     | $1.3 \times 10^{-4}$ |
| 1000       | 0.13                                   | 0.05                                   | -7.55                  | 0.20     | $2.0 \times 10^{-4}$ |
| 1500       | 0.13                                   | 0.03                                   | -7.38                  | 0.22     | $1.2 \times 10^{-4}$ |
| 2000       | 0.13                                   | 0.02                                   | -7.34                  | 0.23     | $1.7 \times 10^{-4}$ |
| 2500       | 0.12                                   | 0.02                                   | -7.34                  | 0.25     | $1.3 \times 10^{-4}$ |
| 3000       | 0.12                                   | 0.01                                   | -7.30                  | 0.25     | $2.0 \times 10^{-4}$ |

**Table S8** The parameters obtained by fitting the ac magnetic susceptibilities for  $\beta$ -Nd under different dc fields at 2K.

| Field / Oe | $\chi_T / \text{cm}^3 \text{mol}^{-1}$ | $\chi_S / \text{cm}^3 \text{mol}^{-1}$ | $\ln(\tau / \text{s})$ | $\alpha$ | Residual             |
|------------|----------------------------------------|----------------------------------------|------------------------|----------|----------------------|
| 400        | 0.25                                   | 0.21                                   | -7.73                  | 0.08     | $3.3 \times 10^{-4}$ |
| 600        | 0.25                                   | 0.18                                   | -7.60                  | 0.18     | $2.8 \times 10^{-4}$ |
| 800        | 0.25                                   | 0.14                                   | -7.51                  | 0.26     | $3.2 \times 10^{-4}$ |
| 1000       | 0.25                                   | 0.11                                   | -7.38                  | 0.30     | $4.3 \times 10^{-4}$ |
| 1500       | 0.24                                   | 0.07                                   | -7.16                  | 0.31     | $3.0 \times 10^{-4}$ |
| 2000       | 0.24                                   | 0.05                                   | -7.06                  | 0.32     | $5.5 \times 10^{-4}$ |
| 2500       | 0.24                                   | 0.04                                   | -7.01                  | 0.35     | $2.2 \times 10^{-3}$ |
| 3000       | 0.23                                   | 0.04                                   | -7.03                  | 0.33     | $8.4 \times 10^{-4}$ |
| 3500       | 0.22                                   | 0.02                                   | -7.04                  | 0.43     | $1.9 \times 10^{-3}$ |
| 4000       | 0.21                                   | 0.03                                   | -7.12                  | 0.35     | $1.1 \times 10^{-3}$ |
| 4500       | 0.21                                   | 0.03                                   | -7.22                  | 0.36     | $1.2 \times 10^{-3}$ |
| 5000       | 0.11                                   | 0.07                                   | -7.35                  | 0.46     | $1.7 \times 10^{-3}$ |

**Table S9** The parameters obtained by fitting the ac magnetic susceptibilities for  **$\gamma$ -Nd** under different dc fields at 2K.

| Field / Oe | $\chi_T / \text{cm}^3 \text{mol}^{-1}$ | $\chi_S / \text{cm}^3 \text{mol}^{-1}$ | $\ln(\tau / \text{s})$ | $\alpha$ | Residual             |
|------------|----------------------------------------|----------------------------------------|------------------------|----------|----------------------|
| 400        | 0.28                                   | 0.21                                   | -7.51                  | 0.04     | $9.1 \times 10^{-4}$ |
| 600        | 0.28                                   | 0.16                                   | -7.59                  | 0.02     | $5.9 \times 10^{-4}$ |
| 800        | 0.28                                   | 0.12                                   | -7.47                  | 0.05     | $1.5 \times 10^{-3}$ |
| 1000       | 0.27                                   | 0.09                                   | -7.42                  | 0.03     | $4.8 \times 10^{-3}$ |
| 1500       | 0.27                                   | 0.05                                   | -7.28                  | 0.05     | $9.5 \times 10^{-4}$ |
| 2000       | 0.26                                   | 0.04                                   | -7.27                  | 0.03     | $1.4 \times 10^{-3}$ |
| 2500       | 0.25                                   | 0.02                                   | -7.30                  | 0.06     | $2.5 \times 10^{-3}$ |
| 3000       | 0.25                                   | 0.01                                   | -7.29                  | 0.06     | $2.0 \times 10^{-3}$ |
| 3500       | 0.24                                   | 0.01                                   | -7.38                  | 0.09     | $2.3 \times 10^{-3}$ |
| 4000       | 0.23                                   | 7.79E-13                               | -7.48                  | 0.13     | $5.3 \times 10^{-3}$ |
| 4500       | 0.22                                   | 1.15E-12                               | -7.59                  | 0.09     | $2.3 \times 10^{-3}$ |
| 5000       | 0.20                                   | 1.66E-12                               | -7.67                  | 0.10     | $2.7 \times 10^{-3}$ |

**Table S10** The parameters obtained by fitting the  $\chi_M''$  versus frequency data of compound  **$\gamma$ -Ce** under 2 kOe dc field.

| $T / \text{K}$ | $\chi_T / \text{cm}^3 \text{mol}^{-1}$ | $\chi_S / \text{cm}^3 \text{mol}^{-1}$ | $\ln(\tau / \text{s})$ | $\alpha$ | Residual             |
|----------------|----------------------------------------|----------------------------------------|------------------------|----------|----------------------|
| 2.2            | 0.11                                   | 0.02                                   | -7.50                  | 0.21     | $5.5 \times 10^{-4}$ |
| 2.4            | 0.11                                   | 0.02                                   | -7.60                  | 0.21     | $6.6 \times 10^{-4}$ |
| 2.6            | 0.10                                   | 0.02                                   | -7.72                  | 0.20     | $2.2 \times 10^{-4}$ |
| 2.8            | 0.09                                   | 0.02                                   | -7.83                  | 0.21     | $1.1 \times 10^{-4}$ |
| 3.0            | 0.09                                   | 0.02                                   | -7.91                  | 0.19     | $1.8 \times 10^{-4}$ |
| 3.2            | 0.08                                   | 0.02                                   | -7.99                  | 0.18     | $1.7 \times 10^{-4}$ |
| 3.4            | 0.08                                   | 0.03                                   | -8.08                  | 0.17     | $2.5 \times 10^{-4}$ |
| 3.6            | 0.07                                   | 0.03                                   | -8.18                  | 0.17     | $2.7 \times 10^{-4}$ |
| 3.8            | 0.07                                   | 0.03                                   | -8.25                  | 0.13     | $2.7 \times 10^{-5}$ |
| 4.0            | 0.07                                   | 0.03                                   | -8.34                  | 0.11     | $4.9 \times 10^{-5}$ |

**Table S11** The parameters obtained by fitting the  $\chi_M''$  versus frequency data of compound  **$\beta$ -Nd** under 2 kOe dc field.

| $T / K$ | $\chi_T / \text{cm}^3 \text{mol}^{-1}$ | $\chi_S / \text{cm}^3 \text{mol}^{-1}$ | $\ln(\tau / \text{s})$ | $\alpha$ | Residual             |
|---------|----------------------------------------|----------------------------------------|------------------------|----------|----------------------|
| 1.8     | 0.33                                   | 0.09                                   | -7.39                  | 0.23     | $5.2 \times 10^{-4}$ |
| 2.0     | 0.30                                   | 0.10                                   | -7.49                  | 0.20     | $6.2 \times 10^{-4}$ |
| 2.2     | 0.27                                   | 0.10                                   | -7.58                  | 0.20     | $3.4 \times 10^{-4}$ |
| 2.4     | 0.25                                   | 0.10                                   | -7.67                  | 0.18     | $2.6 \times 10^{-4}$ |
| 2.6     | 0.23                                   | 0.09                                   | -7.79                  | 0.16     | $2.4 \times 10^{-4}$ |
| 2.8     | 0.22                                   | 0.09                                   | -7.88                  | 0.14     | $1.7 \times 10^{-4}$ |
| 3.0     | 0.21                                   | 0.09                                   | -8.02                  | 0.13     | $9.6 \times 10^{-5}$ |
| 3.2     | 0.19                                   | 0.09                                   | -8.16                  | 0.12     | $9.2 \times 10^{-5}$ |
| 3.4     | 0.18                                   | 0.09                                   | -8.33                  | 0.10     | $1.5 \times 10^{-4}$ |
| 3.6     | 0.17                                   | 0.09                                   | -8.54                  | 0.09     | $1.1 \times 10^{-4}$ |
| 3.8     | 0.16                                   | 0.09                                   | -8.80                  | 0.09     | $1.2 \times 10^{-4}$ |
| 4.0     | 0.16                                   | 0.09                                   | -9.07                  | 0.08     | $8.3 \times 10^{-5}$ |
| 4.2     | 0.15                                   | 0.08                                   | -9.46                  | 0.13     | $7.8 \times 10^{-5}$ |
| 4.4     | 0.14                                   | 0.08                                   | -9.73                  | 0.12     | $5.7 \times 10^{-5}$ |
| 4.6     | 0.14                                   | 0.08                                   | -10.21                 | 0.15     | $8.4 \times 10^{-5}$ |

**Table S12** The parameters obtained by fitting the  $\chi_M''$  versus frequency data of compound  **$\gamma$ -Nd** under 2 kOe dc field.

| $T / K$ | $\chi_T / \text{cm}^3 \text{mol}^{-1}$ | $\chi_S / \text{cm}^3 \text{mol}^{-1}$ | $\ln(\tau / \text{s})$ | $\alpha$ | Residual             |
|---------|----------------------------------------|----------------------------------------|------------------------|----------|----------------------|
| 2.0     | 0.13                                   | 0.02                                   | -7.36                  | 0.04     | $3.1 \times 10^{-4}$ |
| 2.2     | 0.12                                   | 0.02                                   | -7.56                  | 0.05     | $2.8 \times 10^{-4}$ |
| 2.4     | 0.12                                   | 0.02                                   | -7.76                  | 0.06     | $1.5 \times 10^{-4}$ |
| 2.6     | 0.11                                   | 0.01                                   | -7.97                  | 0.05     | $2.3 \times 10^{-4}$ |
| 2.8     | 0.09                                   | 0.01                                   | -8.19                  | 0.07     | $1.5 \times 10^{-4}$ |
| 3.0     | 0.09                                   | 0.01                                   | -8.42                  | 0.07     | $3.2 \times 10^{-5}$ |
| 3.2     | 0.09                                   | 0.01                                   | -8.57                  | 0.06     | $1.3 \times 10^{-5}$ |
| 3.5     | 0.08                                   | 0.01                                   | -8.92                  | 0.05     | $1.5 \times 10^{-4}$ |
| 3.8     | 0.07                                   | 0.01                                   | -9.10                  | 0.02     | $1.7 \times 10^{-4}$ |
| 4.1     | 0.07                                   | 0.01                                   | -9.58                  | 0.02     | $1.2 \times 10^{-5}$ |
| 4.4     | 0.07                                   | 0.02                                   | -9.83                  | 0.03     | $1.0 \times 10^{-5}$ |



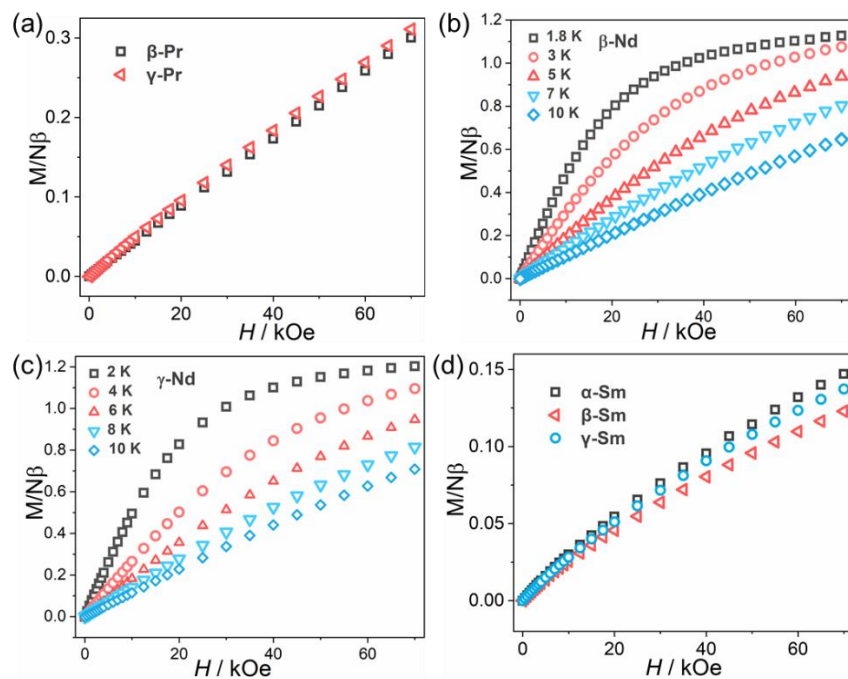

**Figure S6.** The isothermal magnetization for  $\beta$ -Pr and  $\gamma$ -Pr (a),  $\beta$ -Nd(b),  $\gamma$ -Nd(c),  $\alpha$ -Sm,  $\beta$ -Sm and  $\gamma$ -Sm(d) as a function of  $H$  at depicted temperatures.

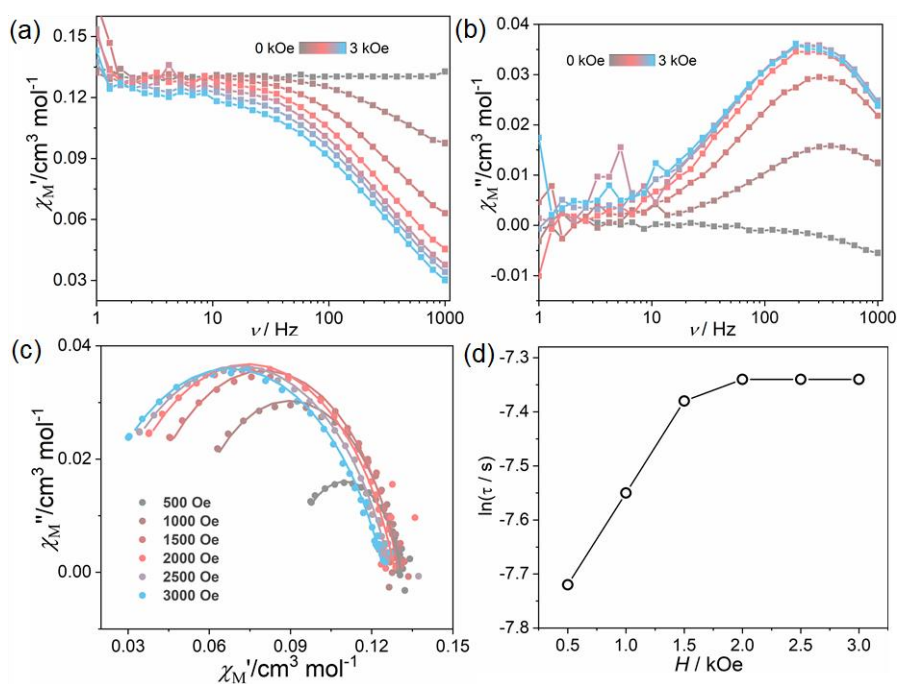

**Figure S7.** Frequency dependence of the  $\chi_M'$  (a) and  $\chi_M''$  (b) signals of compound  $\gamma$ -Ce at 2 K under different  $dc$  fields; (b) Cole-Cole plots for  $\gamma$ -Ce obtained by using the  $ac$  susceptibility data at 2K under different fields; (c) Field dependent magnetic relaxation time at 2 K for  $\gamma$ -Ce. Solid lines are eye-guided.

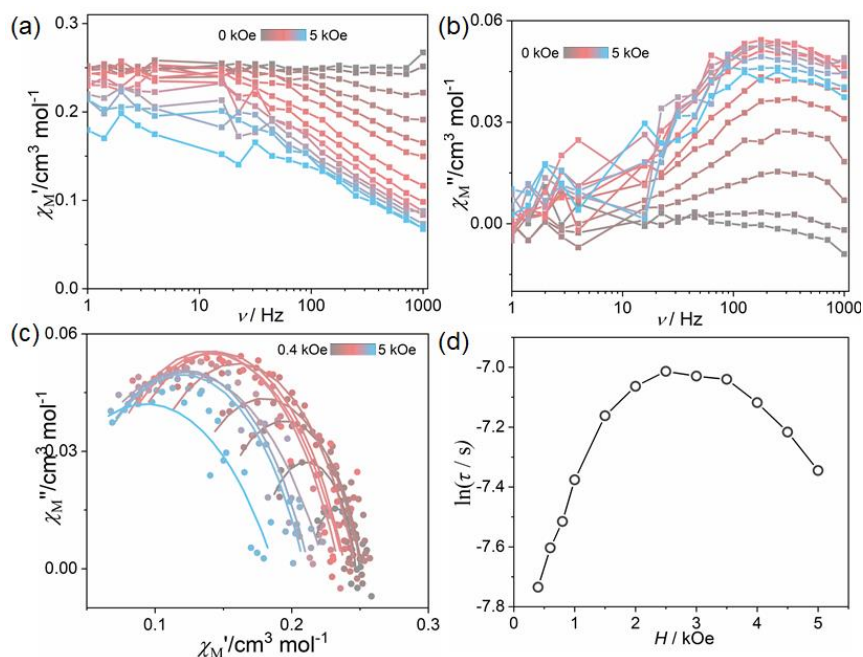

**Figure S8.** Frequency dependence of the  $\chi_M'$  (a) and  $\chi_M''$  (b) signals of compound  $\beta$ -Nd at 2 K under different  $dc$  fields; (b) Cole-Cole plots for  $\beta$ -Nd obtained by using the  $ac$  susceptibility data at 2K under different fields; (c) Field dependent magnetic relaxation time at 2 K for  $\beta$ -Nd. Solid lines are eye-guided.

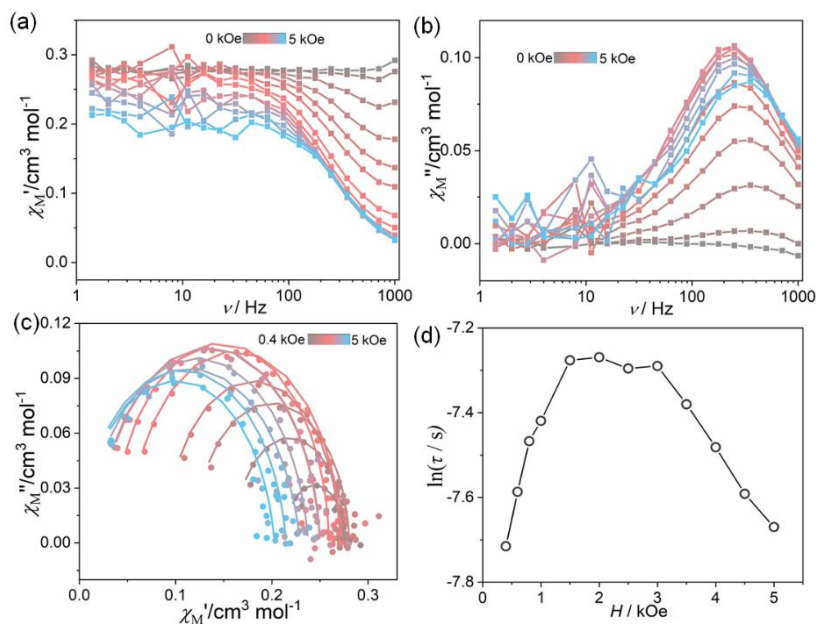

**Figure S9.** Frequency dependence of the  $\chi_M'$  (a) and  $\chi_M''$  (b) signals of compound  $\gamma$ -Nd at 2 K under different  $dc$  fields; (b) Cole-Cole plots for  $\gamma$ -Nd obtained by using the  $ac$  susceptibility data at 2K under different fields; (c) Field dependent magnetic relaxation time at 2 K for  $\gamma$ -Nd. Solid lines are eye-guided.

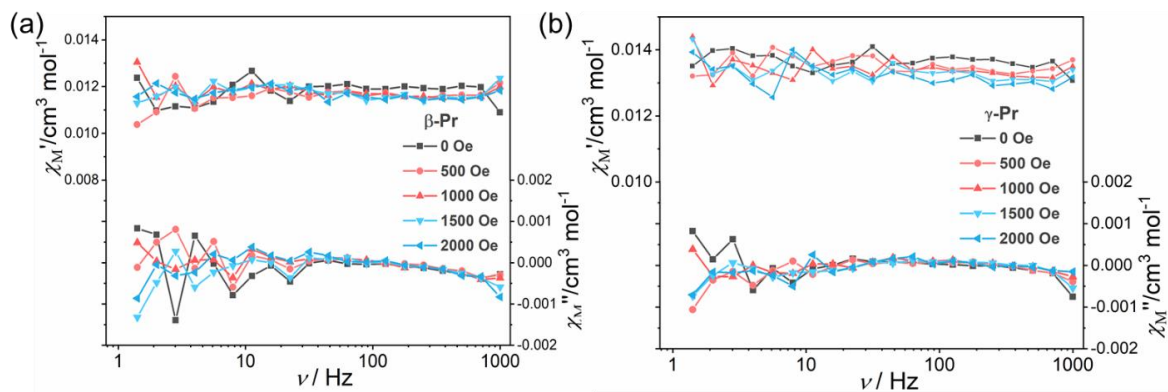

**Figure S10.** In-phase ( $\chi'$ ) and out-of-phase ( $\chi''$ ) ac susceptibilities at depicted dc field for  $\beta$ -Pr (a) and  $\gamma$ -Pr (b).

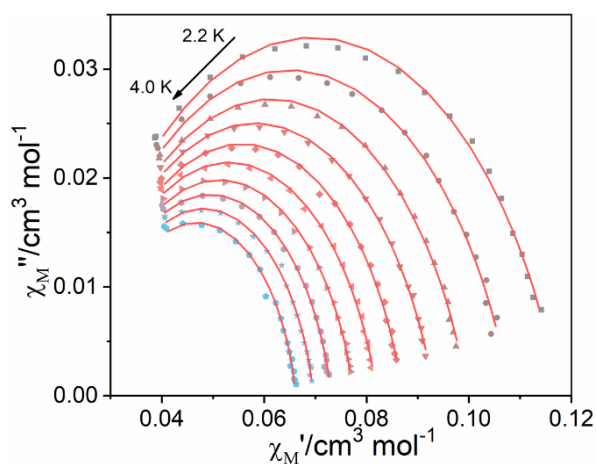

**Figure S11.** Cole-Cole plots for  $\gamma$ -Ce measured in the different temperatures range under 2 kOe dc field. The solid line represents the best fit using a generalized Debye model.

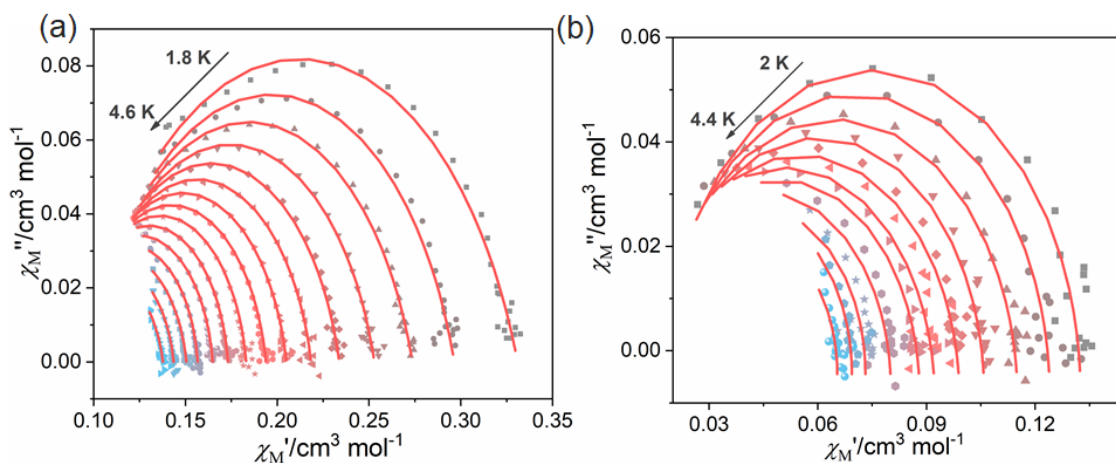

**Figure S12.** Cole-Cole plots for  $\beta$ -Nd (a) and  $\gamma$ -Nd (b) measured in the different temperatures range under 2 kOe dc field. The solid line represents the best fit using a generalized Debye model.

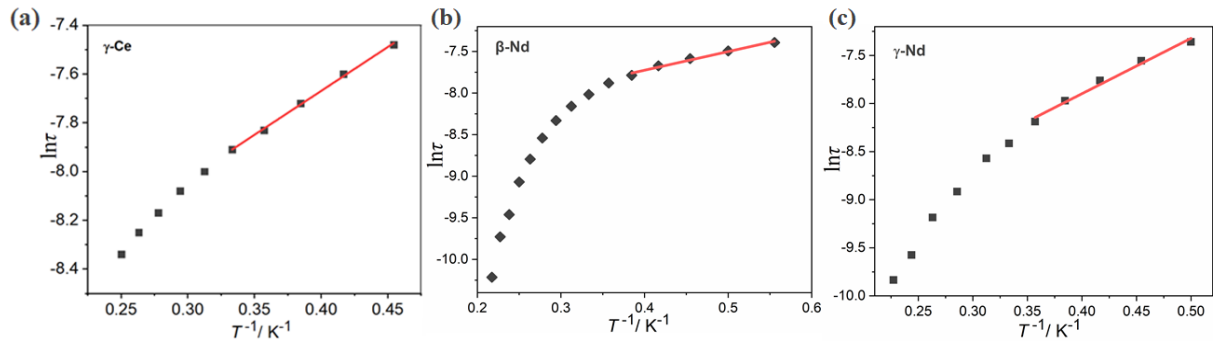

**Figure S13.** The  $\ln(\tau)$  vs.  $T^{-1}$  plots for  $\gamma$ -Nd (a),  $\beta$ -Nd (b) and  $\gamma$ -Nd (c) fitted to the equation  $\tau \sim [\exp(\hbar\omega\alpha/k_B T)]$ .

## V. References:

- 1 S. Hino, M. Maeda, K. Yamashita, Y. Kataoka, M. Nakano, T. Yamamura, H. Nojiri, M. Kofu, O. Yamamuro, T. Kajiwara, *Dalton Trans.* 2013, **42**, 2683–2686.
- 2 J. D. Rinehart and J. R. Long, *Dalton Trans.*, 2012, **41**, 13572–13574.
- 3 J. J. Le Roy, I. Korobkov, J. E. Kim, E. J. Schelterb and M. Murugesu, *Dalton Trans.*, 2014, **43**, 2737–2740.
- 4 C. Takehara, P. L. Then, Y. Kataoka, M. Nakano, T. Yamamura and T. Kajiwara, *Dalton Trans.*, 2015, **44**, 18276–18283.
- 5 J. J. Baldoví, J. M. Clemente-Juan, E. Coronado, Y. Duan, A. Gaita-Ariño and C. Gimenez-Saiz, *Inorg. Chem.* 2014, **53**, 9976–9980.
- 6 J. J. Le Roy, S. I. Gorelsky, I. Korobkov and M. Murugesu, *Organometallics* 2015, **34**, 1415–1418.
- 7 S. K. Singh, T. Gupta, L. Ungur and G. Rajaraman, *Chem. Eur. J.* 2015, **21**, 13812–13819.
- 8 H. Wada, S. Ooka, T. Yamamura and T. Kajiwara, *Inorg. Chem.*, 2017, **56**, 147–155
- 9 Q.-W. Li, R.-C. Wan, Y.-C. Chen, J.-L. Liu, L.-F. Wang, J.-H. Jia, N. F. Chilton and M.-L. Tong, *Chem. Commun.*, 2016, **52**, 13365–13368.
- 10 H. Wada, S. Ooka, D. Iwasawa, M. Hasegawa and T. Kajiwara, *Magnetochemistry* 2016, **2**, 43.
- 11 M.-X. Xu, Y.-S. Meng, J. Xiong, B.-W. Wang, S.-D. Jiang and S. Gao, *Dalton Trans.*, 2018, **47**, 1966–1971.
- 12 S. K. Gupta, S. Shanmugan, T. Rajeshkumar, A. Borah, M. Damjanović, M. Schulze, W. Wernsdorfer, G. Rajaraman and R. Murugavel, *Dalton Trans.*, 2019, **48**, 15928–15935.
- 13 H.-L. Zhang, X.-Y. Wu, J.-Z. Liao, X.-F. Kuang, W.-B. Yang and C.-Z. Lu, *Dalton Trans.*, 2018, **47**, 1796–1800.
- 14 Y.-C. Chen, X.-S. Huang, J.-L. Liu and M.-L. Tong, *Inorg. Chem.* 2018, **57**, 11782–11787.
- 15 J. Li, L. Yin, S.-J. Xiong, X.-L. Wu, F. Yu, Z.-W. Ouyang, Z.-C. Xia, Y.-Q. Zhang, J. van Tol, Y. Song and Z.-X. Wang, *iScience* 2020, **23**, 100926.
- 16 A. Ben Khélifa, M. Salah Belkhiria, G. Huang, S. Freslon, O. Guilloub and K. Bernot, *Dalton Trans.*, 2015, **44**, 16458–16464.
- 17 S. Demir, K. R. Meihaus, J. R. Long, *J. organomet. Chem*, 2018, **857**, 164–169.
- 18 R. Vicente, A. Tubau, S. Speed, F. A. Mautner, F. Bierbaumer, R. C. Fischer and S. S. Massoud, *New J. Chem.*, 2021, **45**, 14713–14723.
- 19 A. Arauzo, A. Lazarescu, S. Shova, E. Bartolomé, R. Cases, J. Luzón, J. Bartolomé and C. Turta, *Dalton Trans.*, 2014, **43**, 12342–12356
- 20 H.-H. Chen, L. Sun, K.-T. Zheng, J.-P. Zhang, P.-T. Ma, J.-P. Wang and J.-Y. Niu, *Dalton Trans.*, 2022, **51**, 10257–10265.
- 21 B. Casanovas, M. Font-Bardía, S. Speed, M. Salah El Fallah and R. Vicente, *Eur. J. Inorg. Chem.* 2018, 1928–1937.
- 22 B. Casanovas, S. Speed, O. Maury, M. Salah El Fallah, M. Font-Bardía and R. Vicente, *Eur. J. Inorg. Chem.* 2018, 3859–3867.
- 23 G. Huang, G. Calvez, Y. Suffren, C. Daiguebonne, S. Freslon, O. Guillou and K. Bernot, *Magnetochemistry* 2018, **4**, 44
- 24 R. Jankowski, J. J. Zakrzewski, M. Zychowicz, J. H. Wang, Y. Oki, S. Ohkoshi, S. Chorazy and B. Sieklucka, *J. Mater. Chem. C*, 2021, **9**, 10705–10717.
- 25 K. S. Das, S. Saha, B. Pal, A. Adhikary, S. Moorthy, S. Bala, S. Akhtar, P. K. Ghose, S. K. Singh, P. P. Ray and R. Mondal, *Dalton Trans.*, 2022, **51**, 1617–1633.

- 26 A. Kaur Jassal, N. Aliaga-Alcalde, M. Corbella, D. Aravena, E. Ruiz and G. Hundal, *Dalton Trans.*, 2015, **44**, 15774–15778.
- 27 A. Kaur Jassal, B. Singh Sran, Y. Suffren, K. Bernot, F. Pointillart, O. Cador and G. Hundal, *Dalton Trans.*, 2018, **47**, 4722–4732.
- 28 S. Chorazy, T. Charytanowicz, J. Wang, S. Ohkoshi and B. Sieklucka, *Dalton Trans.*, 2018, **47**, 7870–7874.
- 29 E. Bartolomé, A. Arauzo, J. Luzón, S. Melnic, S. Shova, D. Prodius, I. C. Nlebedim, F. Bartolomé and J. Bartolomé, *Dalton Trans.*, 2019, **48**, 15386–15396.
